# Supplementary material
Source: ML conference proceedings conference paper supplement (https://proceedings.mlr.press/v189/ghiassi23b.html)
Supplement: Supplementary file [file ghiassi23b-supp.pdf]

# Supplementary Material: Trusted Loss Correction for Noisy Multi-Label Learning

**Amirmasoud Ghiassi\***

*Delft University of Technology, Delft, Netherlands*

S.GHIASSI@TUDELFT.NL

**Cosmin Octavian Pene\***

*Delft University of Technology, Delft, Netherlands*

PENE.COSMIN.OCTAVIAN@GMAIL.COM

**Robert Birke**

*Computer Science dept., University of Turin, Turin, Italy*

ROBERT.BIRKE@UNITO.IT

**Lydia Y.Chen**

*Delft University of Technology, Delft, Netherlands*

LYDIAYCHEN@IEEE.ORG

**Editors:** Emtiyaz Khan and Mehmet Gönen

## TLCM

Algorithm 1 depicts our TLCM algorithm.

---

### Algorithm 1: TLCM

---

**Input** : Multi-label corruption matrix  $\widehat{\mathbf{C}}$  (Algorithm 2), Untrained classifier  $g$ , Noisy data  $\mathcal{S}$ , trusted multi-label data  $\mathcal{G}$ , Number of epochs  $E_{max}$

**Output:** Trained robust classifier  $g$

```

for  $e = 1, \dots, E_{max}$  do
  for  $(\mathbf{x}, \mathbf{y}) \in \mathcal{G}$  do
    | Train  $g(\cdot; \phi)$  with  $\ell = \mathcal{L}_{ASL}(\sigma(g(\mathbf{x})), \mathbf{y})$ 
  end
  for  $(\mathbf{x}, \hat{\mathbf{y}}) \in \mathcal{S}$  do
    | Train  $g(\cdot; \phi)$  with  $\ell = \mathcal{L}_{ASL}(\widehat{\mathbf{C}}^T \sigma(g(\mathbf{x})), \hat{\mathbf{y}})$ 
  end
end

```

---

## Noise Corruption Matrix Estimation

Algorithm 2 depicts our novel noise corruption matrix estimation method.

---

\*. These authors contributed equally to this work

---

**Algorithm 2:** TLCM  $\widehat{C}$  estimation
 

---

**Input** : Noisy data  $\mathcal{S}$ , trusted single-label data  $\mathcal{G}_S$ , silver classifier  $f$ , Number of epoch  $E_{max}$

**Output:** Estimated  $\widehat{C}$

```

for  $e = 1, \dots, E_{max}$  do
  | for  $(\mathbf{x}, \hat{\mathbf{y}}) \in \mathcal{S}$  do
  | | Train  $f(\cdot; \theta)$  with  $\ell = \mathcal{L}_{ASL}(f(\mathbf{x}), \hat{\mathbf{y}})$ 
  | end
end
/* Single-label noise matrix */
Fill  $\widetilde{C} \in \mathbb{R}^{K \times K}$  with zeros
for  $k = 1, \dots, K$  do
  |  $N_k = 0$ 
  | for  $(\mathbf{x}, \mathbf{y}) \in \mathcal{G}_S, y_k = 1$  do
  | |  $N_k += 1$ 
  | |  $\widetilde{C}_{k\cdot} += f_{soft}(\mathbf{x})$ 
  | end
  |  $\widetilde{C}_{k\cdot} = \frac{1}{N_k} \widetilde{C}_{k\cdot}$ 
end
/* Multi-label noise matrix */
Fill  $\widehat{C} \in \mathbb{R}^{K \times K}$  with zeros
for  $k = 1, \dots, K$  do
  |  $N_k = 0$ 
  | for  $(\mathbf{x}, \mathbf{y}) \in \mathcal{G}, y_k = 1$  do
  | |  $N_k += 1$ 
  | | Fill  $\mathbf{r} \in \mathbb{R}^K$  with zeros
  | | for  $l = 1, \dots, K, l \neq k, y_l = 1$  do
  | | |  $\mathbf{r} += \widetilde{C}_{k\cdot} - \widetilde{C}_{l\cdot}$ 
  | | end
  | |  $\widehat{C}_{k\cdot} += \sigma(f(\mathbf{x})) + \mathbf{r}$ 
  | end
  |  $\widehat{C}_{k\cdot} = \frac{1}{N_k} \widehat{C}_{k\cdot}$ 
end

```

---
